# Supplementary material
Source: PubMed Central journal article supplement (PMC9755467)

# THE LANCET

## Supplementary appendix

This appendix formed part of the original submission. We post it as supplied by the authors.

Supplement to: Gurdasani D, Alwan NA, Greenhalgh T, et al. School reopening without COVID-19 mitigation risks accelerating the pandemic. *Lancet* 2021; published online March 10. [http://dx.doi.org/10.1016/S0140-6736\(21\)00622-X](http://dx.doi.org/10.1016/S0140-6736(21)00622-X).

**Figure 1: Estimated SARS-CoV-2 prevalence in different age groups (Office for National Statistics Infection Survey)**

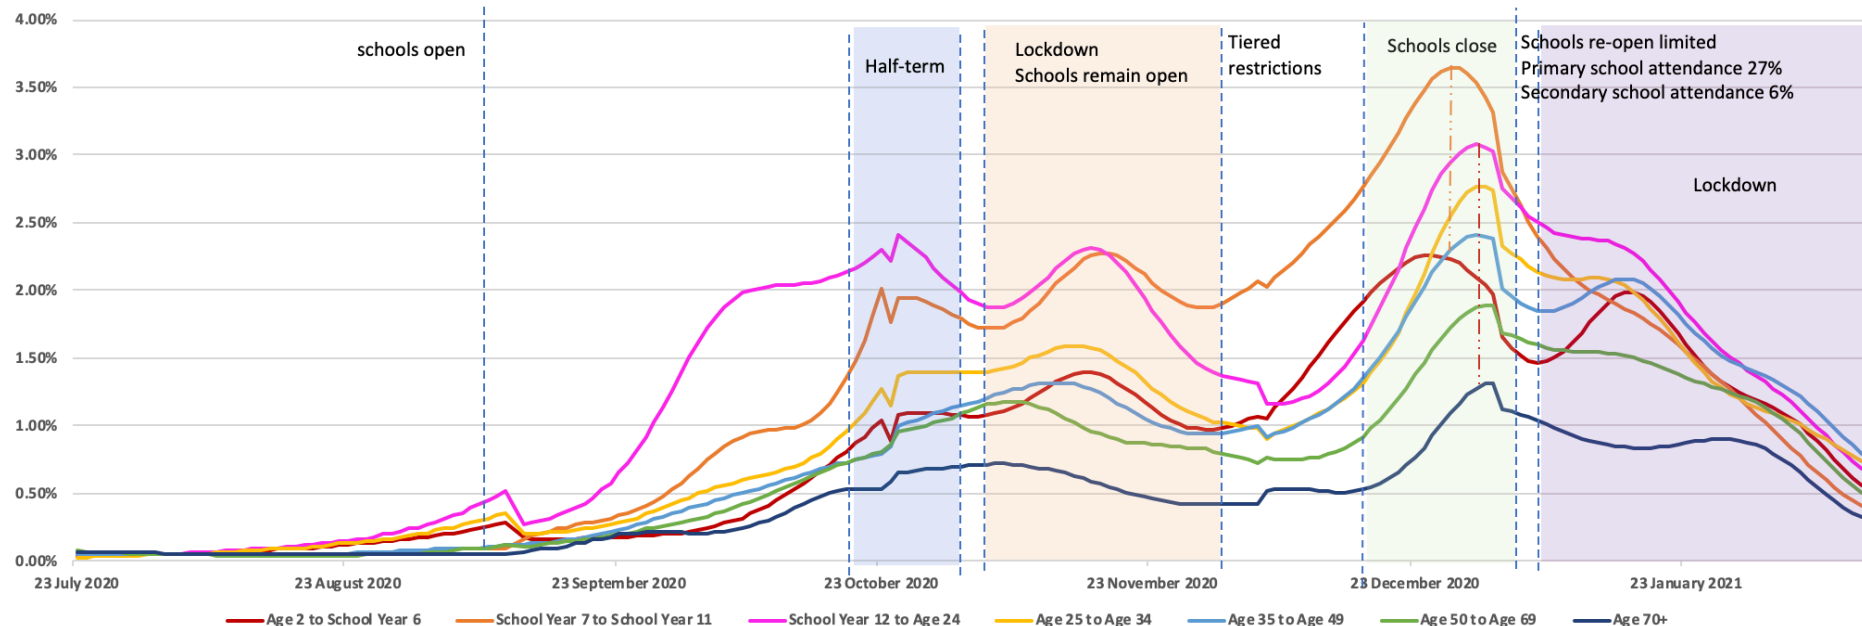

The figure shows the estimated prevalence of SARS-CoV-2 over time across different age groups based on the ONS Infection Survey (<https://www.ons.gov.uk/peoplepopulationandcommunity/healthandsocialcare/conditionsanddiseases/bulletins/coronaviruscovid19infectionsurvey/pilot/previousReleases>). Infections in school age children broadly track school openings and closures. Infections rose sharply following school openings in September. They dropped during half-term in primary, secondary and higher education age groups, as well as in young adults, and rose again once schools opened. The Scientific Advisory Group for Emergencies (SAGE) has attributed this drop and rise to half-term school closures with moderate confidence. During lockdown, community infections fell in other age groups before dropping in school age children, suggesting that transmission in the school setting reduced as background community transmission fell. Infection rates rose sharply in primary school and secondary school age groups as lockdown was eased. At the end of the school term on the 18<sup>th</sup> December, primary and secondary school children had the highest prevalence of infection across all age groups. Following school closures, infections declined in primary and secondary school children ahead of declines in all other age groups (peak of infection following school closure shown in orange and red dashed and dotted lines for school-age children, and other age groups). Following limited school re-opening, infections increased sharply in primary school children and adults aged 35-49 years, in line with the higher attendance in primary schools (27%) and early years settings (61%), compared with secondary schools (6%), where prevalence declined consistently.

## Recommendations for making schools safer.

### Physical distancing

1. **Reduce mixing during travel to and while at school:** Children should travel to school in family groups and/or small fixed social bubbles. Windows should be opened on buses/cars, and children should wear masks. Air should not be re-circulated. Where possible, schools should consider modifying start times to allow students who use public transport to avoid rush hour. Mixing at school gates should be minimised. Opening and closing times, class transitions and other activities that require use of shared spaces by large groups, should be staggered to reduce the level of mixing.
2. **Reduce class sizes to allow physical distancing:** This can be done through blended in-person and remote learning and use of currently unused large spaces such as churches and community centres, and outdoor marquees, when the weather allows. Bubbles of students and staff need to be manageable, and must be kept strictly apart. Bubble sizes should be capped (many schools have bubbles of several hundred) and teachers should minimise movement between bubbles. This will require recruitment of additional teaching and support staff.
3. **Quarantine policies need to account for aerosol transmission:** Transmission can occur at distances greater than those specified in physical distancing guidelines. All students sharing the bubble of a confirmed or suspected case should quarantine, contrary to current Department of Education guidance which suggests only students who were in close proximity to a case must quarantine (1). There will be less disruption when quarantine is required if bubble sizes are small (see also point 2).

### Protections for students and staff

4. **Test children in schools:** Regular lateral flow and other rapid tests can be used to identify additional asymptomatic cases to break chains of transmission. These must be confirmed by PCR testing, as per CDC recommendations. The Department for Education guidance recommends twice a week testing for all staff and secondary school children (1). Adherence to testing must be monitored carefully, to understand the effectiveness of these. Importantly, these are not a replacement for mitigatory measures and should not be used to replace quarantine of contacts of infected individuals, as this may increase infection risk. Schools must be supported adequately with testing, which should be conducted by those trained to do this well. Testing should be accompanied by re-emphasising the need for all mitigatory measures with clear public messaging about accuracy of tests so as to avoid providing false reassurance.
5. **Prioritise those at high exposure risk for vaccination, including school staff:** In order to maximise the chance of keeping classes and schools operating, school staff should be in the next prioritisation group for vaccination along with other frontline key workers. UK vaccine priority lists should be updated to include level of exposure as a risk factor, including for parents.
6. **Hand and surface hygiene:** Handwashing stations, and hand sanitisers should be made available throughout the school. Regular handwashing, and at key points, including entry into buildings, and toilet use should be encouraged.

7. **Wastewater testing:** Wastewater testing can potentially provide a non-invasive tool for early identification of local outbreaks in schools and allow more targeted clinical testing, where needed, providing an early warning and response strategy to contain transmission (2).

### **Ventilation and face coverings**

8. **Ventilation of classroom and staff spaces:** Open windows and doors whenever possible when teaching indoors. Good ventilation is vital and CO<sub>2</sub> monitors should be used to gauge the efficacy of ventilation and balance it with thermal comfort. Where ventilation with outdoor air is not possible, measures should be taken to implement HEPA filtration with indoor air cleaning devices (3). Where possible, teaching and other activities should be moved outdoors or into larger spaces such as halls, taking advantage of the onset of spring and summer. Activities associated with a high-risk of aerosol transmission (e.g. singing or use of wind instruments) should be held outdoors, or replaced with safer alternatives. Physical education classes should always be held outdoors
9. **Use of properly fitting face coverings by staff and students aged 5 years and above in all indoor spaces:** This should take into account tolerability, health conditions and children's wellbeing. Consistent and correct use of masks, as well as safe disposal practices should be taught and reinforced. Masks should be provided regularly by the government, as has been done in other countries. Masks should only be removed when outdoors or eating. Eating should be done outside where possible. If this is not possible, lunch times should be staggered, with few children at a time in well-ventilated rooms. The use of transparent masks should be considered to improve communication.

### **Mitigate inequalities and harms due to remote learning and educational disruption**

9. **Support blended and remote learning:** This will allow schools to move between in-person, blended and remote teaching as required and these decisions should be guided by a traffic light system, informed by epidemiological data not arbitrary dates. This has been suggested by Independent SAGE (4) and is in use in Israel (5), which, like the UK, has a rapid vaccine roll out. Parents should be allowed to opt for remote schooling, especially in the case of clinically vulnerable children or household members. Mandating in-person schooling has led to many parents having to de-register their children from school due to legitimate concerns about risk to themselves and their families, after being threatened with prosecution and fines, further contributing to inequities, and impacting mental health.
10. **Protect and support vulnerable students:** Socioeconomic inequalities in education should be addressed by providing adequate technological, financial and practical support for remote or rota learning when needed. There must be IT, wifi and study space provision for all, to support periods during which students need to quarantine or isolate. A large number of students still do not have access to these. For children who rely on school meals, there should be provisions for the safe pick-up or delivery of school meals. Mental health support must be expanded in all schools. A Young Minds report showed that only 27% of students had been able to talk to anyone about how they were feeling when they returned to school (6). Every school should have sufficient counsellors for students to access support from. Children affected by abuse and domestic violence may be at increased risk when having to quarantine or isolate with their abuser. Schools should designate a qualified person in whom students can confide. Students and staff should be

regularly reminded that they can speak with this person in a safe and confidential manner. Schools should ensure staff are aware of how to report suspected violence.

11. **Address the harms caused by educational disruption:** We need urgent action to recognise the harms of missing school for those who have experienced severe educational disruption and are graduating from school this summer. This should be recorded alongside grades and should be taken into account in the transition to jobs, colleges, and universities. There should also be enhanced skills provision (e.g. summer schools, foundation years) to provide the skills students have missed, so they can thrive in their new settings.
12. **Mental health support for staff:** We need urgent mental health support for school staff who have been exposed to rapidly changing environments they have needed to adapt to, often with very little notice, and little support from government. This is worsened by legitimate concerns about the risk posed to themselves, in an environment without robust mitigations in place, particularly for those who are clinically vulnerable. Clinically vulnerable staff should be allowed to continue shielding, and protect themselves from risk of exposure related to in-person teaching. Confidential counselling services should be available for all staff to access. Education policy should be co-created alongside all stakeholders, including teachers, and parents, to hear their voices, address legitimate concerns, empower them and provide appropriate resources and support to schools, staff and families.

It is important to re-emphasise that making schools safer goes hand in hand with reducing community transmission to very low levels. Schools need ample resources, guidance, and support to implement adequate mitigation measures that focus on cleaning the shared indoor air over surfaces. Clearly, there are no easy or perfect solutions. This will be hard work but essential to protect community health and allow schools to safely reopen and remain open(7).

## References

1. Department for Education. Schools coronavirus (COVID-19) operational guidance. February 2021. Available at: [https://assets.publishing.service.gov.uk/government/uploads/system/uploads/attachment\\_data/file/963541/Schools\\_coronavirus\\_operational\\_guidance.pdf](https://assets.publishing.service.gov.uk/government/uploads/system/uploads/attachment_data/file/963541/Schools_coronavirus_operational_guidance.pdf)
2. Hassard F, Lundy L, Singer AC, Grimsley J, Di Cesare M. Innovation in wastewater near-source tracking for rapid identification of COVID-19 in schools. *The Lancet Microbe*. 2; 1; E4-5; 2021.
3. Allen J, Spengler J, Jones E, Cedeno-Laurent J. 5-step guide to checking ventilation rates in classrooms. Harvard T.H. Chan School of Public Health; 2020.
4. The Independent SAGE Report 34. The return to schools: A consultation document. February 2021 <https://www.independentsage.org/wp-content/uploads/2021/02/Schools-consultation-Feb-2021-2.pdf>

5. Ministry of Health, Israel. Covid-19 Guidance. <https://www.gov.il/en/Departments/Guides/ramzor-cites-guidelines>
6. Young Minds. Coronavirus impact on young people with mental health needs. Survey 3: Autumn 2020. Return to School. 2020. <https://youngminds.org.uk/media/4119/youngminds-survey-with-young-people-returning-to-school-coronavirus-report-autumn-report.pdf>
7. Lessler J, Grabowski MK, Grantz KH, Badillo-Goicoechea E, Metcalf JE, Lupton-Smith C et al. Household COVID-19 risk and in-person schooling. MedRxiv. 2021. <https://doi.org/10.1101/2021.02.27.21252597>

Figure 2: Recommendations for making schools safer

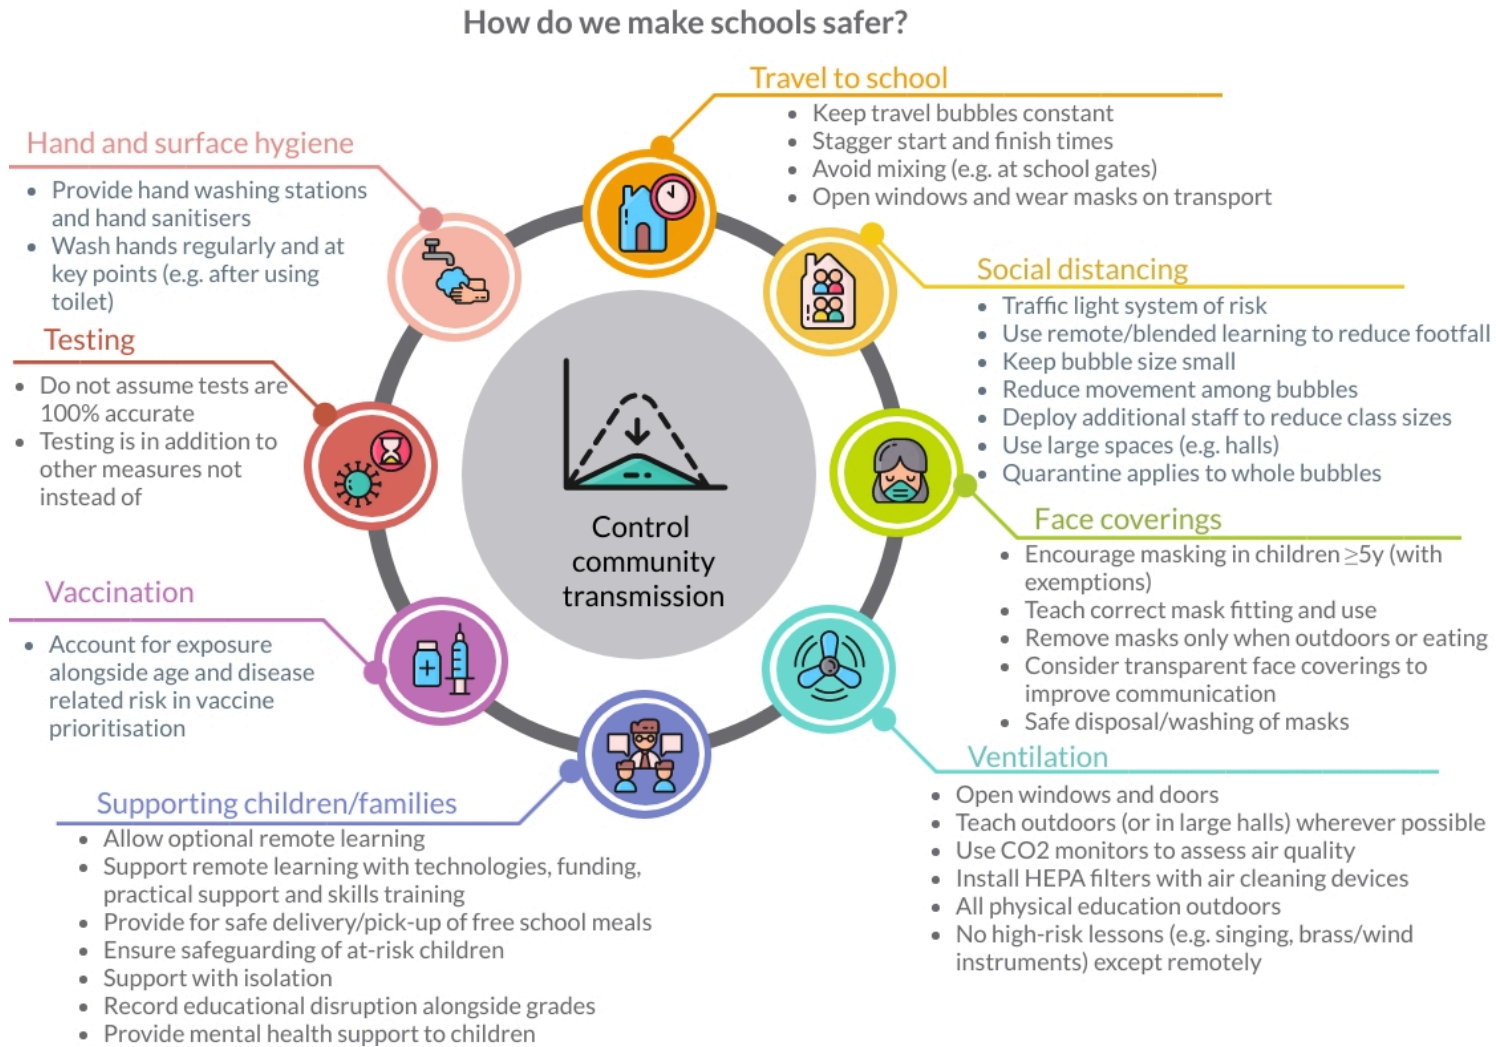

Supplement: mmc1.pdf [file mmc1.pdf]
